# Supplementary material for: Highly responsive glutathione functionalized green AuNP probe for precise colorimetric detection of Cd2+ contamination in the environment
Source: Royal Society of Chemistry journal article supplement (doi:10.1039/c5ra12427a), 2015-01-01
Supplement: c5ra12427a1.pdf [file c5ra12427a1.pdf]

**Highly responsive glutathione functionalized green AuNP probe for precise colorimetric  
detection of Cd<sup>2+</sup> contamination in the environment**

Rajarathinam Manjumeena,<sup>\*a</sup> Dhanapal Duraibabu<sup>b</sup>, Thangavelu Rajamuthuramalingam<sup>c</sup>,  
Ramasamy Venkatesan<sup>d</sup> and Puthupalayam Thangavelu Kalaichelvan<sup>a</sup>

<sup>a</sup>CAS in Botany, University of Madras, Guindy Campus, Chennai- 600 025, India

<sup>b</sup>Department of Chemistry, Anna University, Chennai- 600 025, India

<sup>c</sup>Department of Biotechnology, University of Madras, Guindy Campus, 600 025, India

<sup>d</sup>National Institute of Ocean Technology, Chennai- 600100, India

\*manjumeena1989@gmail.com

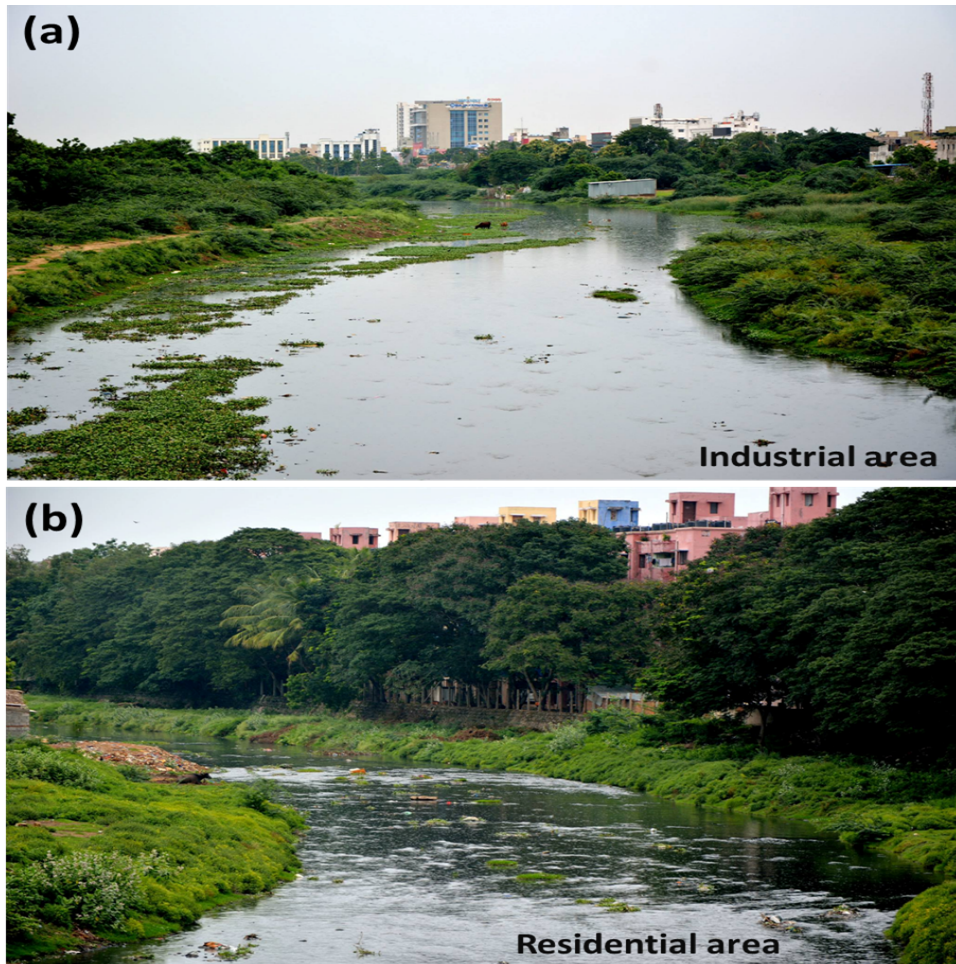

**Fig. S1.** (a) Photograph of Ranipet industrial area (b) Photograph of residential area in the vicinity.

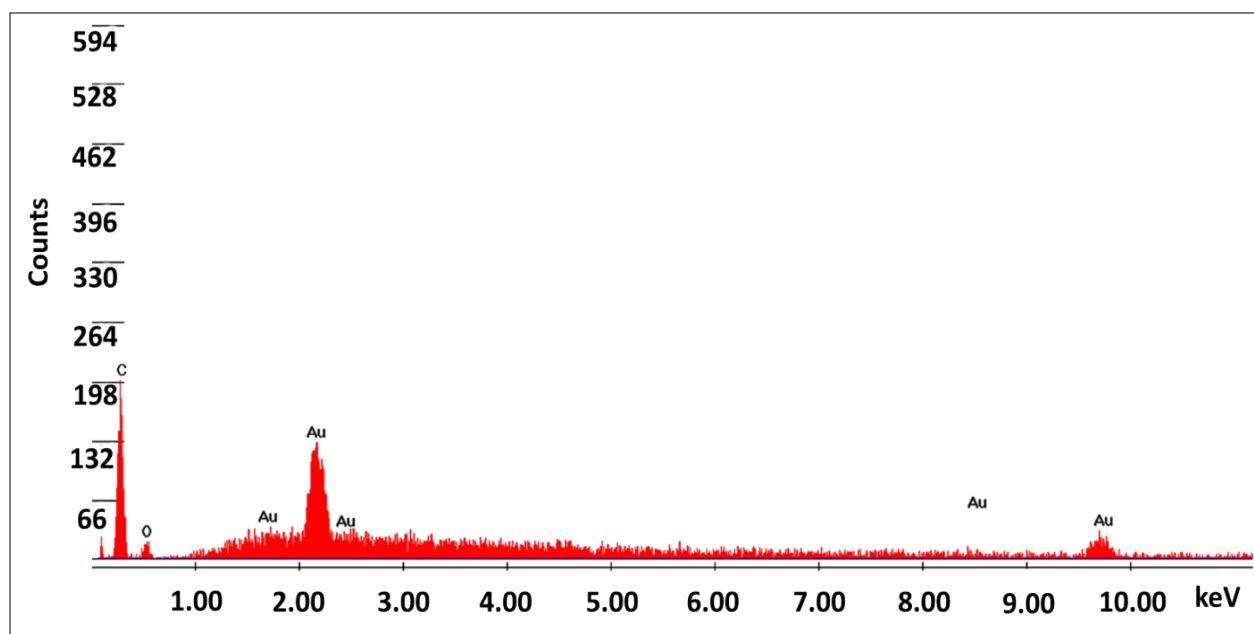

**Fig. S2.** EDAX spectrum of AuNPs.

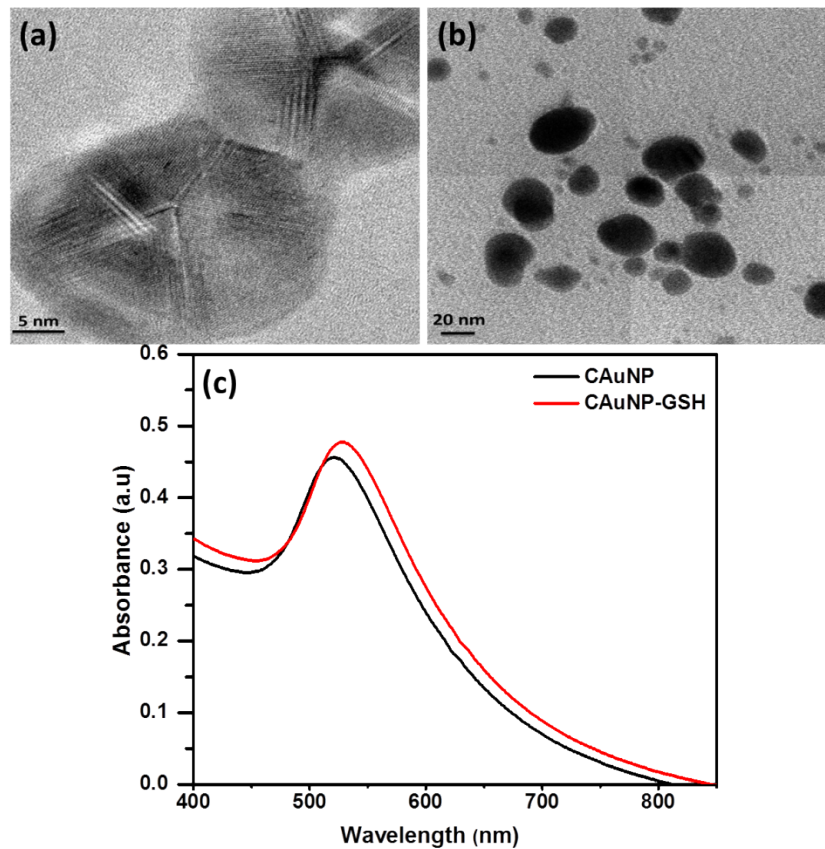

**Fig. S3.** (a) (b) HRTEM micrographs of the chemically synthesized AuNPs (c) UV-Vis absorption spectra of chemically synthesized AuNps (control) before and after functionalization with GSH

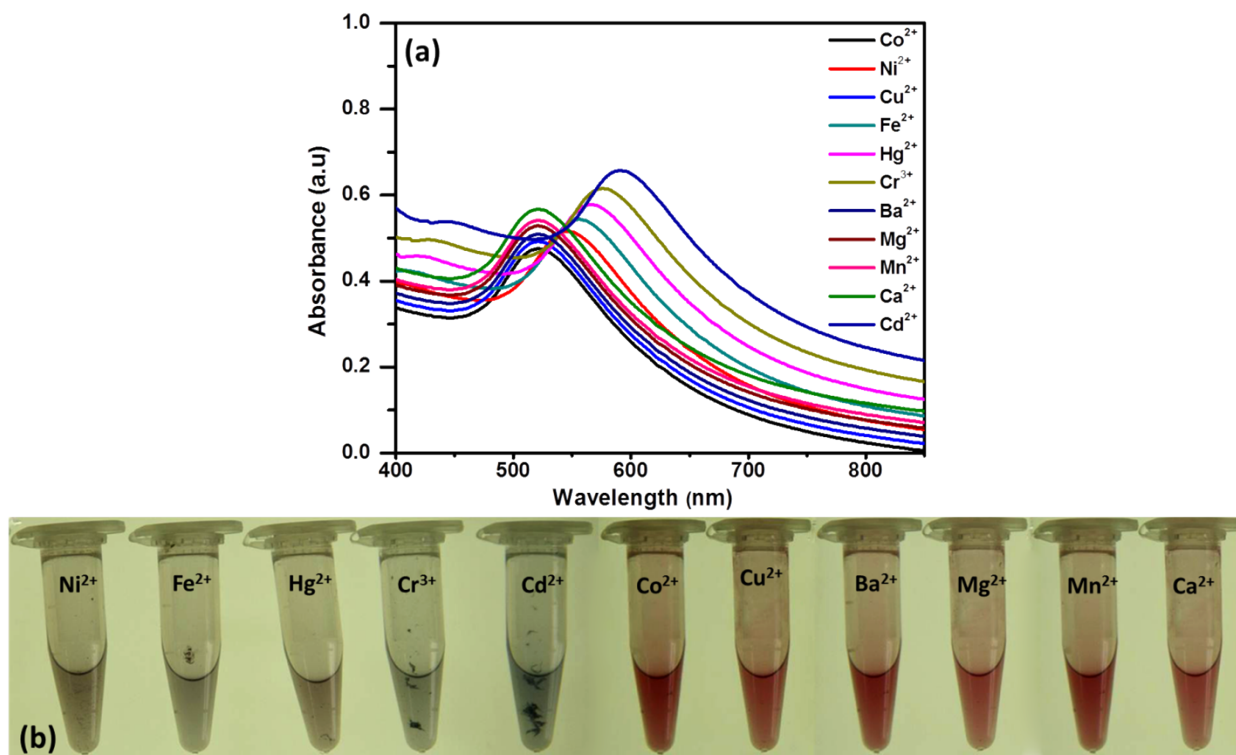

**Fig. S4.** (a) UV- Vis absorption spectra of chemically synthesized AuNPs- GSH (control) and  
 (b) the corresponding color change photo images of chemically synthesized  
 AuNPs- GSH added with different metal ions showing selectivity/interference

**Table S1** Synoptic table of Au-based colorimetric sensor for heavy metal and other analyte detection

| <b>Colorimetric Nanosensor Employed</b> | <b>Route of Synthesis</b>                                                                           | <b>Surface Functionalization</b>                   | <b>Analytical Detection</b>                              | <b>References</b> |
|-----------------------------------------|-----------------------------------------------------------------------------------------------------|----------------------------------------------------|----------------------------------------------------------|-------------------|
| AuNPs                                   | Citrate reduction of HAuCl <sub>4</sub>                                                             | GSH                                                | Cd <sup>2+</sup>                                         | 43                |
| AuNPs                                   | citrate reduction of HAuCl <sub>4</sub>                                                             | 6-mercaptopuronic acid (MNA) and L-Cysteine (LCys) | Cd <sup>2+</sup>                                         | 44                |
| Fluorescent gold nanodots               | Chemical synthesis using tetrakis(hydroxymethyl) phosphonium chloride (THPC) and HAuCl <sub>4</sub> | GSH                                                | Pb <sup>2+</sup>                                         | 45                |
| Fluorescent AuNPs                       | Encapsulation in bio-compatible poly-(amidoamine)                                                   | GSH                                                | Cu <sup>2+</sup>                                         | 46                |
| AuNPs                                   | Citrate reduction of HAuCl <sub>4</sub>                                                             | -                                                  | melamine                                                 | 47                |
| AuNPs                                   | Citrate reduction of HAuCl <sub>4</sub>                                                             | -                                                  | organophosphorus pesticides - mathamidophos              | 48                |
| AuNPs                                   | Citrate reduction of HAuCl <sub>4</sub>                                                             | azide-terminal alkyne functionalization            | Organophosphate pesticide- Paraoxon                      | 49                |
| AuNPs                                   | Citrate reduction of HAuCl <sub>4</sub>                                                             | Papain                                             | Hg <sup>2+</sup> , Pb <sup>2+</sup> and Cu <sup>2+</sup> | 50                |
| AuNPs                                   | Citrate reduction of HAuCl <sub>4</sub>                                                             | 2-mercapto-5-(3-nitrophenyl)-1,3,4-thiadiazole]    | Cd <sup>2+</sup>                                         | 51                |

|                                                                                          |                                                                                        |                                                     |                                                        |    |
|------------------------------------------------------------------------------------------|----------------------------------------------------------------------------------------|-----------------------------------------------------|--------------------------------------------------------|----|
| AuNPs                                                                                    | Citrate reduction of H <sub>AuCl</sub> <sub>4</sub>                                    | Alkane Thiol-Tween 20, 16-mercaptohexadecanoic acid | Glucose oxidase                                        | 52 |
| AuNPs                                                                                    | Citrate reduction of H <sub>AuCl</sub> <sub>4</sub>                                    | 11-mercaptoundecanoic acid                          | Pb <sup>2+</sup> , Cd <sup>2+</sup> , Hg <sup>2+</sup> | 53 |
| AuNPs                                                                                    | Citrate reduction of H <sub>AuCl</sub> <sub>4</sub>                                    | mercaptopropionic acid (MPA) and homocystine        | Hg <sup>2+</sup>                                       | 54 |
| AuNPs                                                                                    | Citrate reduction of H <sub>AuCl</sub> <sub>4</sub>                                    | Chitosan                                            | Zn <sup>2+</sup> and Cu <sup>2+</sup>                  | 55 |
| AuNPs                                                                                    | Citrate reduction of H <sub>AuCl</sub> <sub>4</sub>                                    | DNA-oligonucleotides                                | Hg <sup>2+</sup>                                       | 56 |
| AuNPs                                                                                    | Citrate reduction of H <sub>AuCl</sub> <sub>4</sub>                                    | Dithiocarbamate derivative of calixarene            | Hg <sup>2+</sup>                                       | 57 |
| AuNPs                                                                                    | Gallic acid mediated reduction of H <sub>AuCl</sub> <sub>4</sub>                       | -                                                   | Pb <sup>2+</sup>                                       | 58 |
| Gold nanorods                                                                            | N-cetyl trimethylammonium bromide mediated reduction of H <sub>AuCl</sub> <sub>4</sub> | GSH                                                 | Pb <sup>2+</sup>                                       | 59 |
| Fluorescent gold nanoclusters incorporated into electrospun polyvinyl alcohol nanofibers | Bovine serum albumin mediated reduction of H <sub>AuCl</sub> <sub>4</sub>              | -                                                   | Hg <sup>2+</sup>                                       | 60 |
| AuNPs                                                                                    | Citrate reduction of H <sub>AuCl</sub> <sub>4</sub>                                    | GSH                                                 | Pb <sup>2+</sup>                                       | 61 |

**Table S2** Quantification of metal ions in sample 1 and 2 by atomic absorption spectroscopy

| <b>S.No</b>                  | <b>Transitions metals</b> | <b>Sample 1 (<math>\mu\text{g/L}</math>)</b> | <b>Sample 2 (<math>\mu\text{g/L}</math>)</b> |
|------------------------------|---------------------------|----------------------------------------------|----------------------------------------------|
| 1                            | $\text{Cr}^{3+}$          | 32.5 $\pm$ 0.25                              | 24.0 $\pm$ 0.22                              |
| 2                            | $\text{Ni}^{2+}$          | 23.8 $\pm$ 0.95                              | 11.2 $\pm$ 0.30                              |
| 3                            | $\text{Mn}^{2+}$          | 23.0 $\pm$ 0.20                              | 11.9 $\pm$ 0.41                              |
| 4                            | $\text{Cu}^{2+}$          | 32.0 $\pm$ 0.42                              | 31.1 $\pm$ 0.60                              |
| 5                            | $\text{Hg}^{2+}$          | 43.0 $\pm$ 0.95                              | 30.9 $\pm$ 0.87                              |
| 6                            | $\text{Co}^{2+}$          | 37.5 $\pm$ 0.40                              | 31.2 $\pm$ 0.25                              |
| 7                            | $\text{Cd}^{2+}$          | 33.6 $\pm$ 0.48                              | 25.1 $\pm$ 0.50                              |
| 8                            | $\text{Fe}^{2+}$          | 25.0 $\pm$ 0.98                              | 21.5 $\pm$ 0.45                              |
| <b>Alkaline earth metals</b> |                           |                                              |                                              |
| 9                            | $\text{Mg}^{2+}$          | 21.0 $\pm$ 0.25                              | 18.5 $\pm$ 0.57                              |
| 10                           | $\text{Ca}^{2+}$          | 39.8 $\pm$ 0.47                              | 31.0 $\pm$ 0.63                              |
| 11                           | $\text{Ba}^{2+}$          | 20.1 $\pm$ 0.85                              | 19.5 $\pm$ 0.49                              |
